# Supplementary material for: Sarcopenic Obesity Is a Risk Factor for Worse Oncological Long-Term Outcome in Locally Advanced Rectal Cancer Patients: A Retrospective Single-Center Cohort Study
Source: Nutrients. 2023 Jun 5;15(11):2632. doi: 10.3390/nu15112632 (PMC10255819; doi:10.3390/nu15112632)
Supplement: Supplementary file 1 [file nutrients-15-02632-s001.zip › Supplement Material/Supplement Table 1.pdf]

| Supplement Table 1: Cut off levels of body composition indexes |                   |        |
|----------------------------------------------------------------|-------------------|--------|
|                                                                | Male              | Female |
| Total fat (cm <sup>2</sup> )                                   | >495              | >392   |
| Visceral fat (cm <sup>2</sup> )                                | >163,8            | >80,1  |
| Subcutaneous fat (cm <sup>2</sup> )                            | >210              | >274   |
| VF/TF ratio                                                    | >0,397            | >0,330 |
| SF/TF ratio                                                    | >0,496            | >0,715 |
| SMA (cm <sup>2</sup> )                                         | <134              | <89,2  |
| SMI (cm <sup>2</sup> /m <sup>2</sup> )                         | <41,6             | <32    |
| Sarcopenic obesity                                             | Low SMA / high VF |        |

Abbreviations: VF = Visceral fat, TF = Total fat, SF = Subcutaneous fat, SMA = Skeletal muscle area, SMI = Skeletal muscle index.
